# Supplementary material
Source: Springer Nature journal article supplement (https://www.springermedizin.de/resource/supplementary/12889_2013_6954_MOESM2_ESM.pdf/9499476)
Supplement: MOESM2 [file 9499476]

424 hiv positive patients consulting:

252 females, 172 males

380 patients were excluded

18 had WHO stage 4 (aids)

273 had WHO stage 3

Of patients with WHO stage 1-2:

1 had  $cd4+ >450 \text{ cells/mm}^3$

72 had  $cd4+ <250 \text{ cells/mm}^3$

10 had no  $cd4+$  measurement

2 had started ARV

3 were erroneously classified WHO stage 3

1 was erroneously excluded because of pregnancy

Simple randomisation

21 patients Early treatment  
 $cd4+ <350 \text{ cells/mm}^3$

23 patients Deferred treatment  
 $cd4+ <250 \text{ cells/mm}^3$

2 patients dead  
5 lost to follow-up,  
3 known to be alive

6 patients dead  
9 lost to follow-up,  
4 known to be alive

14 patients clinically evaluated

8 patients clinically evaluated
